# Supplementary material for: Identification of a Steroid Hormone-Associated Gene Signature Predicting the Prognosis of Prostate Cancer through an Integrative Bioinformatics Analysis
Source: MDPI journal article supplement (doi:10.3390/cancers14061565), 2022-03-19
Supplement: s1 [file s1]

## Supplementary Materials:

# Identification of a Steroid Hormone-Associated Gene Signature Predicting the Prognosis of Prostate Cancer Through an Integrative Bioinformatics Analysis

Yo-Liang Lai <sup>1,2</sup>, Chia-Hsin Liu <sup>3</sup>, Shu-Chi Wang <sup>4</sup>, Shu-Pin Huang <sup>5,6,7,8</sup>, Yi-Chun Cho <sup>3</sup>, Bo-Ying Bao <sup>9</sup>, Chia-Cheng Su <sup>10</sup>, Hsin-Chih Yeh <sup>5,11</sup>, Cheng-Hsueh Lee <sup>6</sup>, Pai-Chi Teng <sup>12</sup>, Chih-Pin Chuu <sup>13</sup>, Deng-Neng Chen <sup>14</sup>, Chia-Yang Li <sup>15,16,\*</sup> and Wei-Chung Cheng <sup>1,2,17,\*</sup>

**Table S1.** Functional annotations of genes in MsigDB-C5, KEGG, and REACTOME.

| Function name                                   | Gene_num. | DB    |
|-------------------------------------------------|-----------|-------|
| Lipid metabolic process                         | 4         | GO-BP |
| Regulation of hormone levels                    | 4         | GO-BP |
| Response to oxygen-containing compound          | 4         | GO-BP |
| Steroid metabolic process                       | 4         | GO-BP |
| Cell-cell signaling                             | 3         | GO-BP |
| Cellular hormone metabolic process              | 3         | GO-BP |
| G protein-coupled receptor signaling pathway    | 3         | GO-BP |
| Hormone metabolic process                       | 3         | GO-BP |
| Organic acid metabolic process                  | 3         | GO-BP |
| Organic hydroxy compound metabolic process      | 3         | GO-BP |
| Oxidation regulation process                    | 3         | GO-BP |
| Reproduction                                    | 3         | GO-BP |
| Response to endogenous stimulus                 | 3         | GO-BP |
| Response to hormone                             | 3         | GO-BP |
| Response to lipid                               | 3         | GO-BP |
| Response to organic cyclic compound             | 3         | GO-BP |
| Response to steroid hormone                     | 3         | GO-BP |
| Androgen metabolic process                      | 2         | GO-BP |
| Apoptotic process                               | 2         | GO-BP |
| Cell projection organization                    | 2         | GO-BP |
| Cellular response to endogenous stimulus        | 2         | GO-BP |
| Cellular response to hormone stimulus           | 2         | GO-BP |
| Cellular response to oxygen-containing compound | 2         | GO-BP |
| Developmental process involved in reproduction  | 2         | GO-BP |
| Ion transport                                   | 2         | GO-BP |
| Lipid biosynthetic process                      | 2         | GO-BP |
| Monocarboxylic acid metabolic process           | 2         | GO-BP |
| Multi-organism process                          | 2         | GO-BP |
| Neurogenesis                                    | 2         | GO-BP |

|                                                         |   |          |
|---------------------------------------------------------|---|----------|
| Neuron development                                      | 2 | GO-BP    |
| Neuron differentiation                                  | 2 | GO-BP    |
| Neuropeptide signaling pathway                          | 2 | GO-BP    |
| Positive regulation of cell differentiation             | 2 | GO-BP    |
| Positive regulation of developmental process            | 2 | GO-BP    |
| Positive regulation of multicellular organismal process | 2 | GO-BP    |
| Positive regulation of signaling                        | 2 | GO-BP    |
| Positive regulation of transport                        | 2 | GO-BP    |
| Regulation of cell differentiation                      | 2 | GO-BP    |
| Regulation of ion transport                             | 2 | GO-BP    |
| Regulation of peptide transport                         | 2 | GO-BP    |
| Regulation of transport                                 | 2 | GO-BP    |
| Regulation of trans synaptic signaling                  | 2 | GO-BP    |
| Response to abiotic stimulus                            | 2 | GO-BP    |
| Response to corticosteroid                              | 2 | GO-BP    |
| Response to estradiol                                   | 2 | GO-BP    |
| Response to extracellular stimulus                      | 2 | GO-BP    |
| Response to inorganic substance                         | 2 | GO-BP    |
| Response to nitrogen compound                           | 2 | GO-BP    |
| Response to oxidative stress                            | 2 | GO-BP    |
| Secretion                                               | 2 | GO-BP    |
| Small molecule biosynthetic process                     | 2 | GO-BP    |
| Synaptic signaling                                      | 2 | GO-BP    |
| Metabolic pathways                                      | 4 | KEGG     |
| Steroid hormone biosynthesis                            | 4 | KEGG     |
| Bile secretion                                          | 2 | KEGG     |
| Chemical carcinogenesis                                 | 2 | KEGG     |
| Drug metabolism-cytochrome P450                         | 2 | KEGG     |
| Drug metabolism-other enzymes                           | 2 | KEGG     |
| Metabolism of xenobiotics by cytochrome P450            | 2 | KEGG     |
| Neuroactive ligand-receptor interaction                 | 2 | KEGG     |
| Metabolism                                              | 5 | REACTOME |
| Biological oxidations                                   | 3 | REACTOME |
| Signal transduction                                     | 3 | REACTOME |
| Cilium assembly                                         | 2 | REACTOME |
| GPCR ligand binding                                     | 2 | REACTOME |
| Metabolism of lipids                                    | 2 | REACTOME |
| Metabolism of proteins                                  | 2 | REACTOME |
| Organelle biogenesis and maintenance                    | 2 | REACTOME |
| Phase II-conjugation of compounds                       | 2 | REACTOME |
| Signaling by GPCR                                       | 2 | REACTOME |

**Table S2.** The PICOT analysis of the study.

| <b>P<br/>(Patient/Population)</b> | <b>I (Issue/Intervention)</b>               | <b>C (Comparison)</b>                                      | <b>O (Outcome)</b>                       | <b>T (Time<br/>Frame)</b> |
|-----------------------------------|---------------------------------------------|------------------------------------------------------------|------------------------------------------|---------------------------|
| Patients with prostate cancer     | Steroid hormone - associated gene signature | Higher expression versus lower expression of the signature | Disease progression and patient survival | 5 years                   |

**Table S3.** Steroid hormone relevant pathways in 3 databases

| <b>Database</b> | <b>Pathway name</b>                                                             |
|-----------------|---------------------------------------------------------------------------------|
| GO              | Response to steroid hormone                                                     |
| GO              | Cellular response to steroid hormone stimulus                                   |
| GO              | Steroid hormone mediated signaling pathway                                      |
| GO              | Steroid hormone receptor activity                                               |
| GO              | C21 steroid hormone biosynthetic process                                        |
| GO              | C21 steroid hormone metabolic process                                           |
| GO              | Steroid hormone biosynthetic process                                            |
| GO              | Steroid hormone secretion                                                       |
| GO              | Intracellular steroid hormone receptor signaling pathway                        |
| GO              | Positive regulation of intracellular steroid hormone receptor signaling pathway |
| GO              | Regulation of intracellular steroid hormone receptor signaling pathway          |
| GO              | Steroid hormone receptor binding                                                |
| GO              | Negative regulation of intracellular steroid hormone receptor signaling pathway |
| GO              | Regulation of steroid hormone biosynthetic process                              |
| GO              | Steroid hormone binding                                                         |
| GO              | Positive regulation of steroid hormone secretion                                |
| KEGG            | Steroid hormone biosynthesis                                                    |
| REACTOME        | HSP90 chaperone cycle for steroid hormone receptors (SHR)                       |
| REACTOME        | Metabolism of steroid hormones                                                  |

**Table S4.** The log<sub>2</sub> fold change and corresponding HR of PFI for 92 significantly differentially expressed (SDE) genes.

| gene_symbol | id              | log2 fold change | pvalue    | padj      | mean_rpk   |
|-------------|-----------------|------------------|-----------|-----------|------------|
| CA2         | ENSG00000104267 | -4.49            | 2.20E-78  | 2.78E-75  | 75354.21   |
| CYP2E1      | ENSG00000130649 | -1.89            | 1.31E-25  | 6.61E-24  | 7413.98    |
| HSD17B3     | ENSG00000130948 | 1.32             | 4.89E-11  | 3.69E-10  | 7951.94    |
| SSTR3       | ENSG00000278195 | -1.21            | 2.44E-05  | 8.00E-05  | 596.64     |
| SULT1E1     | ENSG00000109193 | -1.24            | 9.17E-06  | 3.22E-05  | 2365.44    |
| TUBB3       | ENSG00000258947 | 1.32             | 2.14E-10  | 1.48E-09  | 5017.87    |
| UCN         | ENSG00000163794 | 2.17             | 4.31E-41  | 9.53E-39  | 54606.50   |
| UGT2B7      | ENSG00000171234 | -5.68            | 1.25E-54  | 5.80E-52  | 6311.85    |
| CD38        | ENSG00000004468 | -1.52            | 1.53E-08  | 8.15E-08  | 222769.80  |
| CALCR       | ENSG00000004948 | -1.08            | 1.77E-07  | 8.08E-07  | 379.93     |
| ATP1A2      | ENSG00000018625 | -1.67            | 1.89E-15  | 2.50E-14  | 141877.27  |
| SOX30       | ENSG00000039600 | -1.04            | 1.06E-09  | 6.64E-09  | 2853.43    |
| LMO3        | ENSG00000048540 | -2.22            | 4.27E-35  | 5.79E-33  | 22299.63   |
| DKK3        | ENSG00000050165 | -1.09            | 4.87E-14  | 5.35E-13  | 393629.44  |
| TP63        | ENSG00000073282 | -1.85            | 1.11E-15  | 1.51E-14  | 98403.31   |
| PTGS2       | ENSG00000073756 | -3.06            | 5.26E-39  | 9.96E-37  | 307510.42  |
| PGR         | ENSG00000082175 | -1.55            | 1.92E-21  | 5.65E-20  | 16511.80   |
| GSTP1       | ENSG00000084207 | -2.10            | 1.82E-36  | 2.86E-34  | 1516068.57 |
| AKR1B1      | ENSG00000085662 | -3.92            | 2.68E-128 | 1.90E-124 | 338075.19  |
| HSD17B2     | ENSG00000086696 | -1.14            | 4.20E-06  | 1.56E-05  | 2152.50    |
| BMP7        | ENSG00000101144 | -1.01            | 3.07E-07  | 1.36E-06  | 65907.03   |
| CAV1        | ENSG00000105974 | -1.76            | 8.90E-35  | 1.16E-32  | 464839.66  |
| CYP3A5      | ENSG00000106258 | -2.05            | 2.29E-18  | 4.42E-17  | 33260.10   |
| ALDH3A1     | ENSG00000108602 | -1.58            | 1.98E-14  | 2.28E-13  | 9043.21    |
| AREG        | ENSG00000109321 | -1.66            | 3.61E-11  | 2.78E-10  | 47619.09   |
| PPARGC1A    | ENSG00000109819 | -1.80            | 4.26E-24  | 1.78E-22  | 12164.83   |
| ADTRP       | ENSG00000111863 | -3.20            | 4.00E-41  | 8.92E-39  | 19548.57   |
| BMP5        | ENSG00000112175 | -2.24            | 8.87E-08  | 4.26E-07  | 39038.18   |
| BCHE        | ENSG00000114200 | -1.84            | 1.06E-17  | 1.89E-16  | 39588.59   |
| SDC1        | ENSG00000115884 | -1.02            | 1.62E-11  | 1.30E-10  | 799109.96  |
| PADI2       | ENSG00000117115 | -1.04            | 1.64E-08  | 8.72E-08  | 33565.92   |
| HSD11B1     | ENSG00000117594 | -1.41            | 1.65E-16  | 2.51E-15  | 67987.98   |
| NR4A3       | ENSG00000119508 | -1.28            | 7.34E-07  | 3.07E-06  | 86517.65   |
| TGFB3       | ENSG00000119699 | -1.21            | 3.40E-12  | 2.98E-11  | 303770.31  |
| SCGB2A1     | ENSG00000124939 | -1.47            | 3.37E-13  | 3.35E-12  | 104030.49  |
| PTGER2      | ENSG00000125384 | -1.04            | 4.36E-12  | 3.78E-11  | 67182.83   |
| TUBA4A      | ENSG00000127824 | -1.04            | 3.80E-15  | 4.85E-14  | 200297.01  |
| FOXP2       | ENSG00000128573 | -1.32            | 8.91E-17  | 1.40E-15  | 6401.57    |
| CDO1        | ENSG00000129596 | -2.31            | 4.21E-21  | 1.18E-19  | 169506.05  |

|          |                 |       |             |             |            |
|----------|-----------------|-------|-------------|-------------|------------|
| ASS1     | ENSG00000130707 | -1.25 | 6.43E-17    | 1.03E-15    | 677936.22  |
| FSHB     | ENSG00000131808 | 1.21  | 0.000757922 | 0.001913579 | 453.49     |
| DNAJB1   | ENSG00000132002 | -1.21 | 2.42E-20    | 6.10E-19    | 1224334.74 |
| SERPINF1 | ENSG00000132386 | -1.03 | 6.63E-13    | 6.35E-12    | 735848.39  |
| RERG     | ENSG00000134533 | -1.22 | 1.98E-25    | 9.70E-24    | 73669.95   |
| ANXA1    | ENSG00000135046 | -1.05 | 4.24E-15    | 5.36E-14    | 733037.50  |
| HTR1B    | ENSG00000135312 | -1.49 | 7.38E-10    | 4.73E-09    | 1559.16    |
| IL1RN    | ENSG00000136689 | -1.48 | 1.09E-15    | 1.49E-14    | 22917.52   |
| TUBB2A   | ENSG00000137267 | 1.33  | 1.05E-18    | 2.12E-17    | 537419.28  |
| TLR2     | ENSG00000137462 | -1.48 | 8.88E-26    | 4.60E-24    | 34667.45   |
| MGARP    | ENSG00000137463 | -1.45 | 6.63E-24    | 2.69E-22    | 12761.91   |
| METTL21C | ENSG00000139780 | -1.54 | 0.003199539 | 0.007147305 | 4911.22    |
| CYP11A1  | ENSG00000140459 | -1.72 | 3.87E-16    | 5.61E-15    | 5630.53    |
| CYP1A2   | ENSG00000140505 | -2.08 | 1.89E-09    | 1.15E-08    | 677.95     |
| NTRK3    | ENSG00000140538 | -1.16 | 7.38E-11    | 5.44E-10    | 4409.41    |
| TGFB1I1  | ENSG00000140682 | -1.32 | 2.13E-18    | 4.12E-17    | 223371.80  |
| RXRG     | ENSG00000143171 | -1.55 | 1.20E-12    | 1.11E-11    | 4560.43    |
| AGTR1    | ENSG00000144891 | 1.37  | 8.46E-08    | 4.07E-07    | 151191.85  |
| STAR     | ENSG00000147465 | -1.02 | 2.00E-09    | 1.21E-08    | 1205.72    |
| TACC1    | ENSG00000147526 | -1.06 | 6.94E-22    | 2.16E-20    | 259240.11  |
| SCGB1A1  | ENSG00000149021 | -2.51 | 1.61E-13    | 1.66E-12    | 621470.70  |
| AKR1C2   | ENSG00000151632 | -1.22 | 9.21E-10    | 5.82E-09    | 7737.45    |
| PPARGC1B | ENSG00000155846 | -1.26 | 4.13E-24    | 1.73E-22    | 11586.99   |
| FBXO32   | ENSG00000156804 | -1.02 | 5.67E-25    | 2.63E-23    | 364922.30  |
| DYNC1I1  | ENSG00000158560 | -1.25 | 6.28E-19    | 1.31E-17    | 33041.51   |
| S100B    | ENSG00000160307 | -1.36 | 7.97E-11    | 5.85E-10    | 45842.68   |
| CYP3A7   | ENSG00000160870 | -1.55 | 2.49E-16    | 3.71E-15    | 3338.68    |
| CLDN1    | ENSG00000163347 | -1.06 | 7.34E-09    | 4.11E-08    | 254543.03  |
| STARD4   | ENSG00000164211 | -1.14 | 1.32E-16    | 2.04E-15    | 61627.09   |
| PRKCB    | ENSG00000166501 | -1.83 | 1.68E-25    | 8.33E-24    | 29926.74   |
| GALR1    | ENSG00000166573 | -1.72 | 1.79E-12    | 1.62E-11    | 1756.95    |
| UGT1A6   | ENSG00000167165 | -1.64 | 3.08E-09    | 1.81E-08    | 1280.68    |
| OR51E2   | ENSG00000167332 | 2.37  | 1.95E-23    | 7.45E-22    | 4734909.12 |
| DDIT4    | ENSG00000168209 | -1.23 | 9.70E-19    | 1.97E-17    | 738027.89  |
| FAM107A  | ENSG00000168309 | -1.63 | 7.62E-25    | 3.45E-23    | 212074.50  |
| PAQR8    | ENSG00000170915 | -2.62 | 1.72E-76    | 1.80E-73    | 60586.61   |
| BCL2     | ENSG00000171791 | -1.09 | 5.70E-16    | 8.04E-15    | 82910.20   |
| C1QTNF1  | ENSG00000173918 | -1.67 | 1.54E-28    | 1.13E-26    | 179875.02  |
| NPAS4    | ENSG00000174576 | -1.22 | 6.92E-08    | 3.37E-07    | 2961.82    |
| FOSL1    | ENSG00000175592 | -1.65 | 2.03E-09    | 1.23E-08    | 63062.37   |
| CAPZA3   | ENSG00000177938 | -3.28 | 8.72E-12    | 7.26E-11    | 387.69     |
| SSTR2    | ENSG00000180616 | -1.28 | 5.57E-17    | 9.00E-16    | 6496.59    |
| PAQR7    | ENSG00000182749 | -1.50 | 1.23E-43    | 3.17E-41    | 113748.65  |

|         |                 |       |          |          |            |
|---------|-----------------|-------|----------|----------|------------|
| PAPPA   | ENSG00000182752 | -1.03 | 3.19E-11 | 2.48E-10 | 4524.84    |
| FOXL2   | ENSG00000183770 | 2.34  | 8.37E-18 | 1.51E-16 | 16957.40   |
| SLIT3   | ENSG00000184347 | -1.31 | 6.36E-17 | 1.02E-15 | 37665.25   |
| KANK2   | ENSG00000197256 | -1.28 | 3.55E-28 | 2.53E-26 | 432224.65  |
| TUBA3C  | ENSG00000198033 | -1.80 | 6.04E-08 | 2.97E-07 | 544.62     |
| AKR1C4  | ENSG00000198610 | 2.63  | 1.26E-05 | 4.32E-05 | 367.67     |
| HSPA1A  | ENSG00000204389 | -1.06 | 1.57E-09 | 9.61E-09 | 1800080.53 |
| AKR1B15 | ENSG00000227471 | -1.70 | 1.52E-05 | 5.13E-05 | 1166.38    |
| NEFL    | ENSG00000277586 | -1.52 | 1.09E-05 | 3.78E-05 | 27563.60   |
| SRD5A2  | ENSG00000277893 | -1.70 | 8.78E-18 | 1.58E-16 | 94036.35   |

**Table S5.** Univariate analysis results of 8-gene signature and clinical variables.

| <b>5-year PFI uni-variate CoxPH<br/>model</b> | <b>HR</b> | <b>P</b> | <b>L95</b> | <b>U95</b> | <b>C_index</b> |
|-----------------------------------------------|-----------|----------|------------|------------|----------------|
| age_at_diagnosis                              | 1.02      | 0.13     | 0.99       | 1.06       | 0.55           |
| tnm                                           | 1.86      | 0.00     | 1.21       | 2.86       | 0.58           |
| gleason_2group                                | 3.84      | 0.00     | 2.44       | 6.05       | 0.66           |
| psa                                           | 1.00      | 0.35     | 1.00       | 1.00       | 0.33           |
| 8-gene signature                              | 2.93      | 0.00     | 1.84       | 4.67       | 0.62           |
